# Supplementary material for: Time spent in distinct life-history stages has sex-specific effects on reproductive fitness in wild Atlantic salmon
Source: bioRxiv or medRxiv preprint supplement (doi:10.1101/688572), 2019-07-02
Supplement: Supplementary file [file media-1.pdf]

## Supplementary Materials for

# **Time spent in distinct life-history stages has sex-specific effects on reproductive fitness in wild Atlantic salmon**

Kenyon B. Mobley\*, Hanna Granroth-Wilding, Mikko Ellmen, Panu Orell, Jaakko Erkinaro, Craig R.  
Primmer

\*Correspondence to: [kenyon.mobley@helsinki.fi](mailto:kenyon.mobley@helsinki.fi)

### **This file includes:**

Fig S1

Tables S1 to S7

**Figure S1.** Reproductive success (# offspring, RS) and mating success (# mates, MS) as a function of body weight. Numbers indicate age, either freshwater or sea age, of females (orange) and males (blue). Freshwater age could not be assigned to 25 individuals

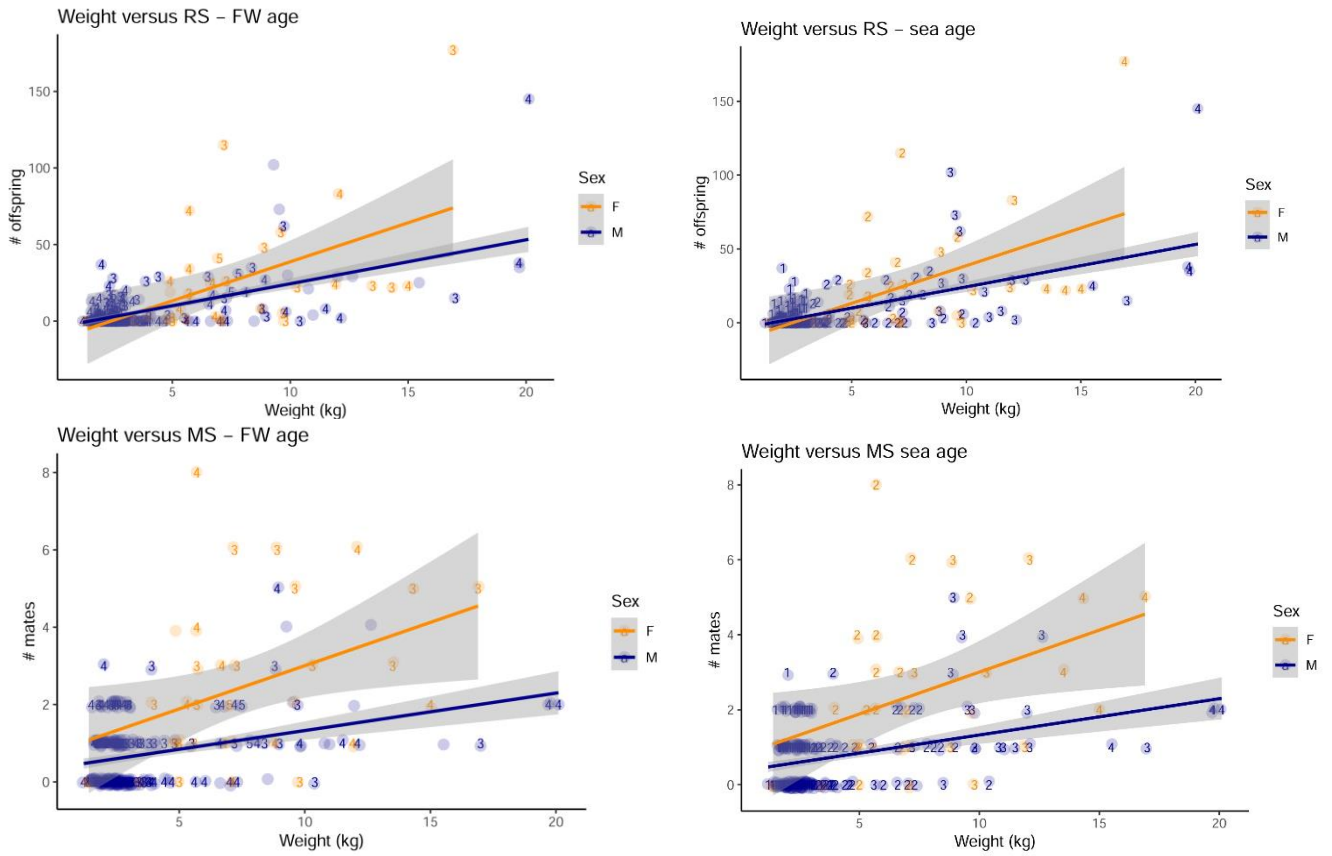

**Table S1.** Summary of data for freshwater age (FW age) and sea age (in seawinters, SW). Number of individuals (n), means ( $\pm$  SE) for weight, body length, condition, reproductive success (# offspring), and mating success (#mates) are listed (all adults dataset).

|             | Freshwater age (FW) |                  |                  | Sea age (SW)    |                  |                  |                  |
|-------------|---------------------|------------------|------------------|-----------------|------------------|------------------|------------------|
|             | 3                   | 4                | 5                | 1               | 2                | 3                | 4                |
| Females     |                     |                  |                  |                 |                  |                  |                  |
| n           | 16                  | 12               | 3                | 2               | 20               | 8                | 4                |
| Weight (kg) | 8.66 $\pm$ 0.93     | 7.63 $\pm$ 1.08  | 4.4 $\pm$ 1.63   | 1.45 $\pm$ 0.05 | 5.87 $\pm$ 0.31  | 9.85 $\pm$ 0.57  | 14.92 $\pm$ 0.72 |
| Length (cm) | 93.6 $\pm$ 3.1      | 88.5 $\pm$ 3.9   | 74.3 $\pm$ 9.9   | 56.5 $\pm$ 0.5  | 84.3 $\pm$ 1.1   | 98.3 $\pm$ 1.3   | 112.0 $\pm$ 1.22 |
| Condition   | -0.07 $\pm$ 0.26    | 0.16 $\pm$ 0.30  | 0.65 $\pm$ 0.94  | 2.06 $\pm$ 0.33 | -0.38 $\pm$ 0.15 | -0.18 $\pm$ 0.30 | 1.25 $\pm$ 0.89  |
| # offspring | 33.4 $\pm$ 12.1     | 25.5 $\pm$ 7.8   | 14.0 $\pm$ 13.5  | --              | 22.1 $\pm$ 6.7   | 27.0 $\pm$ 9.6   | 61.3 $\pm$ 38.6  |
| # mates     | 2.94 $\pm$ 0.50     | 2.41 $\pm$ 0.71  | 1.0 $\pm$ 0.58   | --              | 2.35 $\pm$ 0.48  | 2.75 $\pm$ 0.80  | 3.75 $\pm$ 0.75  |
| Males       |                     |                  |                  |                 |                  |                  |                  |
| n           | 88                  | 109              | 14               | 172             | 38               | 16               | 4                |
| Weight (kg) | 3.28 $\pm$ 0.25     | 3.32 $\pm$ 0.29  | 3.08 $\pm$ 0.54  | 2.31 $\pm$ 0.04 | 5.35 $\pm$ 0.34  | 10.30 $\pm$ 0.65 | 18.8 $\pm$ 1.09  |
| Length (cm) | 69.15 $\pm$ 1.20    | 68.1 $\pm$ 1.3   | 67.5 $\pm$ 3.2   | 63.4 $\pm$ 0.3  | 81.4 $\pm$ 1.7   | 101.7 $\pm$ 2.0  | 120.8 $\pm$ 2.2  |
| Condition   | -0.06 $\pm$ 0.07    | -0.01 $\pm$ 0.07 | -0.11 $\pm$ 0.14 | 0.09 $\pm$ 0.03 | -0.69 $\pm$ 0.12 | -0.17 $\pm$ 0.30 | 3.48 $\pm$ 1.05  |
| # offspring | 4.6 $\pm$ 1.0       | 5.2 $\pm$ 1.4    | 5.6 $\pm$ 2.6    | 2.7 $\pm$ 0.4   | 7.3 $\pm$ 1.7    | 26.6 $\pm$ 7.3   | 60.8 $\pm$ 28.2  |
| # mates     | 0.63 $\pm$ 0.08     | 0.69 $\pm$ 0.09  | 0.71 $\pm$ 0.22  | 0.59 $\pm$ 0.06 | 0.71 $\pm$ 0.12  | 2.81 $\pm$ 0.37  | 1.75 $\pm$ 0.25  |

**Table S2.** Linear models describing sex differences in sea age (SW) as a function of freshwater age (FW) for adults, breeding adults and first-time spawners datasets. Bold p values indicate significance ( $\alpha = 0.05$ ).

|                            | Effect size | SE    | <i>t</i> | p                 |
|----------------------------|-------------|-------|----------|-------------------|
| <b>All adults</b>          |             |       |          |                   |
| SW ~ Sex * FW              |             |       |          |                   |
| Intercept                  | 4.071       | 0.598 | 6.813    | <b>&lt;0.0001</b> |
| Sex                        | -2.669      | 0.651 | -4.105   | <b>&lt;0.0001</b> |
| FW                         | -0.452      | 0.164 | -2.756   | <b>0.0063</b>     |
| Sex:FW                     | 0.417       | 0.178 | 2.343    | <b>0.0200</b>     |
|                            |             |       |          |                   |
| <b>Breeding adults</b>     |             |       |          |                   |
| Sea age ~ Sex + FW         |             |       |          |                   |
| Intercept                  | 3.034       | 0.392 | 7.749    | <b>&lt;0.0001</b> |
| Sex                        | -1.162      | 0.158 | -7.374   | <b>&lt;0.0001</b> |
| FW                         | -0.129      | 0.103 | -1.250   | 0.2130            |
|                            |             |       |          |                   |
| <b>First-time spawners</b> |             |       |          |                   |
| SW ~ Sex + FW              |             |       |          |                   |
| Intercept                  | 2.814       | 0.396 | 7.105    | <b>&lt;0.0001</b> |
| Sex                        | -1.043      | 0.167 | -6.259   | <b>&lt;0.0001</b> |
| FW                         | -0.108      | 0.103 | -1.053   | 0.2940            |

**Table S3.** Linear models for sex differences in body weight as a function of freshwater age (FW) and sea age (SW) for adults, breeding adults and first-time spawners datasets. Bold p values indicate significance ( $\alpha = 0.05$ ).

|                            | Effect size | SE    | <i>t</i> | p                 |
|----------------------------|-------------|-------|----------|-------------------|
| <b>All adults</b>          |             |       |          |                   |
| Weight ~ Sex * FW          |             |       |          |                   |
| Intercept                  | 14.006      | 2.795 | 5.012    | <b>&lt;0.0001</b> |
| Sex                        | -10.633     | 3.041 | -3.497   | <b>&lt;0.0006</b> |
| FW                         | -1.721      | 0.767 | -2.242   | <b>0.0259</b>     |
| Sex:FW                     | 1.697       | 0.833 | 2.037    | <b>0.0427</b>     |
| Weight ~ Sex + SW          |             |       |          |                   |
| Intercept                  | -2.611      | 0.372 | -7.019   | <b>&lt;0.0001</b> |
| Sex                        | 0.513       | 0.281 | 1.827    | 0.0689            |
| SW                         | 4.238       | 0.120 | 35.312   | <b>&lt;0.0001</b> |
| <b>Breeding adults</b>     |             |       |          |                   |
| Weight ~ Sex + FW          |             |       |          |                   |
| Intercept                  | 9.401       | 1.947 | 4.829    | <b>&lt;0.0001</b> |
| Sex                        | -4.439      | 0.784 | -5.664   | <b>&lt;0.0001</b> |
| FW                         | -0.283      | 0.514 | -0.551   | 0.5830            |
| Weight ~ Sex + SW          |             |       |          |                   |
| Intercept                  | -3.290      | 0.477 | -6.891   | <b>&lt;0.0001</b> |
| Sex                        | 0.874       | 0.349 | 2.506    | <b>0.0133</b>     |
| SW                         | 4.543       | 0.152 | 29.852   | <b>&lt;0.0001</b> |
| <b>First-time spawners</b> |             |       |          |                   |
| Weight ~ Sex + FW          |             |       |          |                   |
| Intercept                  | 7.914       | 1.970 | 4.016    | <b>&lt;0.0001</b> |
| Sex                        | -3.681      | 0.829 | -4.438   | <b>&lt;0.0001</b> |
| FW                         | 0.103       | 0.510 | -0.201   | 0.8409            |
| Weight ~ Sex + SW          |             |       |          |                   |
| Intercept                  | -3.581      | 0.470 | -7.624   | <b>&lt;0.0001</b> |
| Sex                        | 1.159       | 0.354 | 3.274    | <b>0.0014</b>     |
| SW                         | 4.570       | 0.150 | 30.393   | <b>&lt;0.0001</b> |

**Table S4.** Linear models for sex differences in body length as a function of freshwater age (FW) and sea age (SW) for adults, breeding adults and first-time spawners datasets. Bold p values indicate significance ( $\alpha = 0.05$ ).

|                            | Effect size | SE    | <i>t</i> | p                 |
|----------------------------|-------------|-------|----------|-------------------|
| <b>All adults</b>          |             |       |          |                   |
| Length ~ Sex + FW          |             |       |          |                   |
| Intercept                  | 96.877      | 5.229 | 18.528   | <b>&lt;0.0001</b> |
| Sex                        | -21.108     | 2.403 | -8.782   | <b>&lt;0.0001</b> |
| FW                         | -1.993      | 1.319 | -1.319   | 0.132             |
| Length ~ Sex + SW          |             |       |          |                   |
| Intercept                  | 44.828      | 1.594 | 28.11    | <b>&lt;0.0001</b> |
| Sex                        | 0.229       | 1.203 | 0.19     | 0.849             |
| SW                         | 18.401      | 0.514 | 35.78    | <b>&lt;0.0001</b> |
| <b>Breeding adults</b>     |             |       |          |                   |
| Length ~ Sex + FW          |             |       |          |                   |
| Intercept                  | 101.677     | 7.937 | 12.811   | <b>&lt;0.0001</b> |
| Sex                        | -20.378     | 3.195 | -6.378   | <b>&lt;0.0001</b> |
| FW                         | -2.691      | 2.094 | -1.295   | 0.2010            |
| Length ~ Sex * SW          |             |       |          |                   |
| Intercept                  | 56.592      | 3.995 | 14.165   | <b>&lt;0.0001</b> |
| Sex                        | -12.294     | 4.154 | -2.960   | <b>0.0036</b>     |
| SW                         | 13.795      | 1.514 | 9.112    | <b>&lt;0.0001</b> |
| Sex:SW                     | 5.676       | 1.648 | 3.443    | <b>&lt;0.0001</b> |
| <b>First-time spawners</b> |             |       |          |                   |
| Length ~ Sex + FW          |             |       |          |                   |
| Intercept                  | 96.806      | 8.183 | 11.830   | <b>&lt;0.0001</b> |
| Sex                        | -18.286     | 3.444 | -5.310   | <b>&lt;0.0001</b> |
| FW                         | -2.039      | 2.118 | -0.963   | 0.3380            |
| Length ~ Sex * SW          |             |       |          |                   |
| Intercept                  | 56.472      | 5.022 | 11.245   | <b>&lt;0.0001</b> |
| Sex                        | -12.176     | 5.134 | -2.372   | <b>0.0192</b>     |
| SW                         | 13.578      | 2.027 | 6.697    | <b>&lt;0.0001</b> |

|        |       |       |       |               |
|--------|-------|-------|-------|---------------|
| Sex:SW | 5.929 | 2.118 | 2.799 | <b>0.0059</b> |
|--------|-------|-------|-------|---------------|

**Table S5.** Linear models for sex differences in condition as a function of freshwater age (FW) and sea age (SW) for adults, breeding adults and first-time spawners datasets. Bold p values indicate significance ( $\alpha = 0.05$ ).

|                            | Effect size | SE    | <i>t</i> | p             |
|----------------------------|-------------|-------|----------|---------------|
| <b>All adults</b>          |             |       |          |               |
| Condition ~ Sex + FW       |             |       |          |               |
| Intercept                  | -0.108      | 0.326 | -0.331   | 0.7410        |
| Sex                        | -0.129      | 0.150 | -0.862   | 0.3890        |
| FW                         | 0.055       | 0.822 | 0.669    | 0.5040        |
| Condition ~ Sex + SW       |             |       |          |               |
| Intercept                  | -0.268      | 0.233 | -1.148   | 0.2520        |
| Sex                        | 0.117       | 0.176 | 0.666    | 0.5060        |
| SW                         | 0.111       | 0.075 | 1.476    | 0.1410        |
| <b>Breeding adults</b>     |             |       |          |               |
| Condition ~ Sex + FW       |             |       |          |               |
| Intercept                  | -0.637      | 0.473 | -1.346   | 0.1810        |
| Sex                        | -0.153      | 0.190 | -0.801   | 0.4240        |
| FW                         | 0.186       | 0.125 | 1.489    | 0.1390        |
| Condition ~ Sex + SW       |             |       |          |               |
| Intercept                  | -0.912      | 0.302 | -3.023   | <b>0.0030</b> |
| Sex                        | 0.313       | 0.220 | 1.418    | 0.1583        |
| SW                         | 0.363       | 0.096 | 3.772    | <b>0.0002</b> |
| <b>First-time spawners</b> |             |       |          |               |
| Condition ~ Sex + FW       |             |       |          |               |
| Intercept                  | -8.030      | 0.463 | -1.734   | 0.0855        |
| Sex                        | 0.031       | 0.195 | 0.159    | 0.8741        |
| FW                         | 0.186       | 0.120 | 1.548    | 0.1244        |
| Length ~ Sex + SW          |             |       |          |               |
| Intercept                  | -0.986      | 0.305 | -3.229   | <b>0.0016</b> |
| Sex                        | 0.447       | 0.230 | 1.941    | 0.0544        |
| SW                         | 0.339       | 0.098 | 3.466    | <b>0.0007</b> |



**Table S6.** Linear models for sex differences in reproductive success (No. offspring) as a function of mating success (No. mates) for adult, breeding adult and first-time spawner datasets. Bold p values indicate significance ( $\alpha = 0.05$ ).

|                                 | Effect size | SE     | <i>t</i> | p                 |
|---------------------------------|-------------|--------|----------|-------------------|
| <b>All adults</b>               |             |        |          |                   |
| No. Offspring ~ Sex * No. mates |             |        |          |                   |
| Intercept                       | -5.362      | 3.945  | -1.359   | 0.1753            |
| Sex                             | 4.483       | 4.143  | 1.082    | 0.2803            |
| No. mates                       | 12.908      | 1.219  | 10.587   | <b>&lt;0.0001</b> |
| Sex * No. mates                 | -3.065      | 1.658  | -1.849   | 0.0656            |
| No. offspring ~ Sex + No. mates |             |        |          |                   |
| Intercept                       | -1.265      | 3.280  | -0.386   | 0.7000            |
| Sex                             | -0.618      | 3.106  | -0.199   | 0.8420            |
| No. mates                       | 11.250      | 0.830  | 13.557   | <b>&lt;0.0001</b> |
| <b>Breeding adults</b>          |             |        |          |                   |
| No. offspring ~ Sex * No. mates |             |        |          |                   |
| Intercept                       | -9.295      | 7.053  | -1.318   | 0.190             |
| Sex                             | 3.997       | 8.217  | 0.486    | 0.627             |
| No. mates                       | 13.837      | 1.978  | 6.996    | <b>&lt;0.0001</b> |
| Sex * No. mates                 | -1.511      | 3.303  | -0.457   | 0.648             |
| No. offspring ~ Sex + No. mates |             |        |          |                   |
| Intercept                       | -7.670      | 6.075  | -1.263   | 0.209             |
| Sex                             | 0.989       | 4.914  | 0.201    | 0.841             |
| No. mates                       | 13.295      | 1.580  | 8.416    | <b>&lt;0.0001</b> |
| <b>First-time spawners</b>      |             |        |          |                   |
| No. offspring ~ Sex * No. mates |             |        |          |                   |
| Intercept                       | -8.6890     | 6.8770 | -1.263   | 0.209             |
| Sex                             | 2.8297      | 7.8329 | 0.361    | 0.718             |
| No. mates                       | 11.7188     | 1.8909 | 6.198    | <b>&lt;0.0001</b> |
| Sex * No. mates                 | 0.8211      | 2.9991 | 0.274    | 0.785             |
| No. offspring ~ Sex + No. mates |             |        |          |                   |
| Intercept                       | -9.683      | 5.820  | -1.664   | 0.0986            |
| Sex                             | 4.537       | 4.724  | 0.960    | 0.336             |
| No. mates                       | 12.045      | 1.462  | 8.236    | <b>&lt;0.0001</b> |

**Table S7.** Results for zero-inflated mixture models (GLMM) showing the effect of sex differences in freshwater age (FW) and sea age (SW) on reproductive success and mating success for breeding adults and first-time spawners. Bold p values indicate significance ( $\alpha = 0.05$ ). All age\*sex interactions were included in the initial model but removed if not significant.

|                             | Effect size | SE   | z      | p                 |
|-----------------------------|-------------|------|--------|-------------------|
| <b>REPRODUCTIVE SUCCESS</b> |             |      |        |                   |
| <b>FW</b>                   |             |      |        |                   |
| <i>Breeding adults</i>      |             |      |        |                   |
| No. offspring ~ Sex + FW    |             |      |        |                   |
| Intercept                   | -3.82       | 0.60 | -6.32  | <b>&lt;0.0001</b> |
| Sex                         | -1.37       | 0.24 | -5.72  | <b>&lt;0.0001</b> |
| FW                          | 0.06        | 0.16 | 0.40   | 0.688             |
| <i>First time spawners</i>  |             |      |        |                   |
| No. offspring ~ Sex + FW    |             |      |        |                   |
| Intercept                   | -4.36       | 0.63 | -6.96  | <b>&lt;0.0001</b> |
| Sex                         | -1.23       | 0.26 | -4.76  | <b>&lt;0.0001</b> |
| FW age                      | 0.16        | 0.16 | 1.01   | 0.311             |
| <b>SW</b>                   |             |      |        |                   |
| <i>Breeding adults</i>      |             |      |        |                   |
| No. offspring ~ Sex + SW    |             |      |        |                   |
| Intercept                   | -5.43       | 0.31 | -17.25 | <b>&lt;0.0001</b> |
| SW                          | 0.69        | 0.10 | 6.86   | <b>&lt;0.0001</b> |
| Sex                         | -0.62       | 0.23 | -2.72  | <b>0.0006</b>     |
| <i>First-time spawners</i>  |             |      |        |                   |
| No. offspring ~ Sex + SW    |             |      |        |                   |
| Intercept                   | -5.46       | 0.32 | -16.99 | <b>&lt;0.0001</b> |
| SW                          | 0.70        | 0.10 | 6.77   | <b>&lt;0.0001</b> |
| Sex                         | -0.62       | 0.24 | -2.59  | <b>0.0097</b>     |
| <b>MATING SUCCESS</b>       |             |      |        |                   |
| <b>FW</b>                   |             |      |        |                   |
| <i>Breeding adults</i>      |             |      |        |                   |
| No. mates ~ Sex * FW        |             |      |        |                   |
| Intercept                   | -4.64       | 0.53 | -8.682 | <b>&lt;0.0001</b> |
| FW                          | -0.40       | 0.15 | -2.609 | 0.0102            |

|                            |       |      |         |                   |
|----------------------------|-------|------|---------|-------------------|
| Sex                        | -3.12 | 0.67 | -4.693  | <b>&lt;0.0001</b> |
| FW*Sex                     | 0.61  | 0.19 | 3.298   | <b>0.0013</b>     |
|                            |       |      |         |                   |
| <i>First-time spawners</i> |       |      |         |                   |
| No. mates ~ Sex * FW       |       |      |         |                   |
| Intercept                  | -4.86 | 0.59 | -8.122  | <b>&lt;0.0001</b> |
| FW age                     | -0.34 | 0.17 | -2.026  | <b>0.0451</b>     |
| Sex                        | -2.90 | 0.73 | -3.996  | <b>0.0001</b>     |
| FW*Sex                     | 0.56  | 0.20 | 2.776   | <b>0.0064</b>     |
|                            |       |      |         |                   |
| <b>SW</b>                  |       |      |         |                   |
| <i>Breeding adults</i>     |       |      |         |                   |
| No. mates ~ Sex + SW       |       |      |         |                   |
| Intercept                  | -6.59 | 0.18 | -36.353 | <b>&lt;0.0001</b> |
| SW                         | 0.20  | 0.06 | 3.192   | <b>0.0018</b>     |
| Sex                        | -0.67 | 0.13 | -5.450  | <b>&lt;0.0001</b> |
|                            |       |      |         |                   |
| <i>First time spawners</i> |       |      |         |                   |
| No. mates ~ Sex + SW       |       |      |         |                   |
| Intercept                  | -6.54 | 0.19 | -34.985 | <b>&lt;0.0001</b> |
| SW                         | 0.20  | 0.07 | 3.021   | <b>0.0030</b>     |
| Sex                        | -0.69 | 0.13 | -5.350  | <b>&lt;0.0001</b> |
